# Supplementary material
Source: publisher site journal article supplement (https://www.spandidos-publications.com/3746/downloadSupplementary)
Supplement: Supplementary file 1 [file downloadSupplementary]

Table SI. Tumor sample site according to tumor type (primary/metastatic).

| Tumor sample site | Primary tumor |      | Metastatic tumor |      |
|-------------------|---------------|------|------------------|------|
|                   | n             | %    | n                | %    |
| Skin              | 6             | 75.0 | 0                | 0    |
| Conjunctiva       | 2             | 25.0 | 0                | 0    |
| Digestive tract   | 0             | 0    | 1                | 3.4  |
| Brain             | 0             | 0    | 9                | 31.0 |
| Subcutaneous      | 0             | 0    | 5                | 17.2 |
| Lymph node        | 0             | 0    | 6                | 20.7 |
| Lung              | 0             | 0    | 4                | 13.8 |
| Liver             | 0             | 0    | 2                | 6.9  |
| Adrenal glands    | 0             | 0    | 1                | 3.4  |
| Undetermined      | 0             | 0    | 1                | 3.4  |

Table SII. Information regarding the reagent costs of *BRAF* testing by different methods per patient.

| Technique                                                                   | Cost of reagent/test, € |
|-----------------------------------------------------------------------------|-------------------------|
| BRAF VE1 IHC (including antibody, diluent, detection system)                | ~22                     |
| Idylla™ (cartridge)                                                         | 120                     |
| Targeted NGS (including DNA extraction, library preparation and sequencing) | ~280                    |

IHC, immunohistochemistry; NGS, next-generation sequencing.

Table SIII. Estimation of the reagent costs for the present case series (n=34).

| <i>BRAF</i> diagnostic method   | Approximate cost, € |
|---------------------------------|---------------------|
| Only IHC                        | 748                 |
| Only NGS                        | 9,520               |
| Only Idylla™                    | 4,080               |
| IHC + NGS when IHC negative     | 9,148               |
| IHC + Idylla™ when IHC negative | 4,350               |

IHC, immunohistochemistry; NGS, next-generation sequencing.
